# Supplementary material for: A control theoretic three timescale model for analyzing energy management in mammalian cancer cells
Source: PubMed Central journal article supplement (PMC7809419; doi:10.1016/j.csbj.2020.12.019), 2020-12-29
Supplement: mmc1.pdf [file mmc1.pdf]

# A Control Theoretic Three Timescale Model for Analyzing Energy Management in Mammalian Cancer Cells

Abhijit Dasgupta<sup>2</sup>, Abhisek Bakshi<sup>4</sup>, Nirmalya Chowdhury<sup>3</sup>, and Rajat K. De<sup>1\*</sup>

<sup>1</sup> Machine Intelligence Unit, Indian Statistical Institute, 203 B.T. Road, Kolkata 700108, India; <sup>2</sup> Department of Data Science, School of Interdisciplinary Studies, University of Kalyani, Kalyani, Nadia 741235, West Bengal, India; <sup>3</sup> Department of Computer Science & Engineering, Jadavpur University, Kolkata 700032, India; <sup>4</sup> Department of Information Technology, Bengal Institute of Technology, Basanti Highway, Kolkata 700150, India

## Supplementary Material

### A Supplementary Tables

**Table S-1** Activation and inhibition of different genes under consideration in the main article.

| Gene no. | Gene name         | Activated by                      | Inhibited by | Basal production rate   | Decay rate              | Feedback constants                               |
|----------|-------------------|-----------------------------------|--------------|-------------------------|-------------------------|--------------------------------------------------|
| 1        | glut1             | HIF_1, P13K, AKT, MYC, mTOR       | p53          | $b_{glut1}$             | $d_{glut1}$             | $\mathcal{F}_1^{(g)}$                            |
| 2        | pgm_1             | HIF_1                             |              | $b_{pgm.1}$             | $d_{pgm.1}$             |                                                  |
| 3        | hk                | HIF_1, P13K, AKT, MYC, mTOR       |              | $b_{hk}$                | $d_{hk}$                |                                                  |
| 4        | g6Pase            | HIF_1                             | AKT, AMPK    | $b_{g6Pase}$            | $d_{g6Pase}$            | $\mathcal{F}_2^{(g)}, \mathcal{F}_3^{(g)}$       |
| 5        | pgi               | HIF_1, AKT, MYC, mTOR             |              | $b_{pgi}$               | $d_{pgi}$               |                                                  |
| 6        | pfk1              | HIF_1, P13K, AKT, MYC, mTOR, AMPK | p53          | $b_{pfk1}$              | $d_{pfk1}$              | $\mathcal{F}_4^{(g)}$                            |
| 7        | f16Bpase          | ERK                               |              | $b_{f16Bpase}$          | $d_{f16Bpase}$          |                                                  |
| 8        | pfk2              | HIF_1, P13K, MYC, AKT, AMPK       | p53          | $b_{pfk2}$              | $d_{pfk2}$              | $\mathcal{F}_5^{(g)}$                            |
| 9        | f26Bpase          | E2F1, ERK, MYC                    |              | $b_{f26Bpase}$          | $d_{f26Bpase}$          |                                                  |
| 10       | ald               | HIF_1, MYC, AKT, mTOR             |              | $b_{ald}$               | $d_{ald}$               |                                                  |
| 11       | tpi               | mTOR                              |              | $b_{tpi}$               | $d_{tpi}$               |                                                  |
| 12       | g3Pdh             | HIF_1, MYC, AKT                   |              | $b_{g3Pdh}$             | $d_{g3Pdh}$             |                                                  |
| 13       | pglck             | HIF_1, MYC, AKT, mTOR             |              | $b_{pglck}$             | $d_{pglck}$             |                                                  |
| 14       | pglcm             | HIF_1, mTOR                       |              | $b_{pglcm}$             | $d_{pglcm}$             |                                                  |
| 15       | enl               | HIF_1, MYC                        |              | $b_{enl}$               | $d_{enl}$               |                                                  |
| 16       | pk                | HIF_1                             | GF           | $b_{pk}$                | $d_{pk}$                | $\mathcal{F}_6^{(g)}$                            |
| 17       | ldh               | HIF_1, MYC, mTOR                  |              | $b_{ldh}$               | $d_{ldh}$               |                                                  |
| 18       | pyrd              | MYC, AKT                          | HIF_1, p53   | $b_{pyrd}$              | $d_{pyrd}$              | $\mathcal{F}_7^{(g)}, \mathcal{F}_8^{(g)}$       |
| 19       | Acyl.coa.syn      | ERK, MYC, STAT3                   |              | $b_{Acyl.coa.syn}$      | $d_{Acyl.coa.syn}$      |                                                  |
| 20       | fa_synthase       | ERK, MYC, E2F1, AKT               | AMPK         | $b_{fa_synthase}$       | $d_{fa_synthase}$       | $\mathcal{F}_9^{(g)}$                            |
| 21       | pyr.crbxylase     | STAT3, NF-κB, p53, MYC, E2F1      |              | $b_{pyr.crbxylase}$     | $d_{pyr.crbxylase}$     |                                                  |
| 22       | pep.crbxykinase1  | NF-κB, ERK                        | AKT, AMPK    | $b_{pep.crbxykinase1}$  | $d_{pep.crbxykinase1}$  | $\mathcal{F}_{10}^{(g)}, \mathcal{F}_{11}^{(g)}$ |
| 23       | cit_synthase      | RORa                              |              | $b_{cit_synthase}$      | $d_{cit_synthase}$      |                                                  |
| 24       | actnase           | HIF_1                             |              | $b_{actnase}$           | $d_{actnase}$           |                                                  |
| 25       | isocit.deh        | MYC                               |              | $b_{isocit.deh}$        | $d_{isocit.deh}$        |                                                  |
| 26       | KG.deh.cmp        | MYC, STAT3                        |              | $b_{KG.deh.cmp}$        | $d_{KG.deh.cmp}$        |                                                  |
| 27       | succ.coa.synthase | MYC, E2F1, ERK                    |              | $b_{succ.coa.synthase}$ | $d_{succ.coa.synthase}$ |                                                  |
| 28       | succ.deh          | MYC, E2F1, p53, AKT               | LPS          | $b_{succ.deh}$          | $d_{succ.deh}$          | $\mathcal{F}_{13}^{(g)}$                         |
| 29       | frmase            | MYC, E2F1, p53, N-κFB             |              | $b_{frmase}$            | $d_{frmase}$            |                                                  |
| 30       | mal.deh           | E2F1, ERK                         |              | $b_{mal.deh}$           | $d_{mal.deh}$           |                                                  |
| 31       | g6Pdeh            | mTOR                              | p53          | $b_{g6Pdeh}$            | $d_{g6Pdeh}$            | $\mathcal{F}_{12}^{(g)}$                         |
| 32       | pglc6             | p53                               |              | $b_{pglc6}$             | $d_{pglc6}$             |                                                  |
| 33       | phglc.deh         | p53, mTOR                         |              | $b_{phglc.deh}$         | $d_{phglc.deh}$         |                                                  |
| 34       | r5Piso_A          | ERK, AKT                          |              | $b_{r5Piso.A}$          | $d_{r5Piso.A}$          |                                                  |
| 35       | rb1s_5P_3ep       | mTOR                              |              | $b_{rb1s.5P.3ep}$       | $d_{rb1s.5P.3ep}$       |                                                  |
| 36       | trkl              | mTOR                              |              | $b_{trkl}$              | $d_{trkl}$              |                                                  |
| 37       | trsd11            | E2F1, STAT3, MYC                  |              | $b_{trsd11}$            | $d_{trsd11}$            |                                                  |

Table S-2 State equations for the genes considered in Table S-1.

| Gene no. | Final equation generated for each gene                                                                                                                                                                |
|----------|-------------------------------------------------------------------------------------------------------------------------------------------------------------------------------------------------------|
| 1        | $glut1 = (\mathcal{K}_1^{(g)} * [HIF\_1] * [P13K] * [AKT] * [MYC] * [mTOR]) / (1 + \mathcal{F}_1^{(g)} * [p53]) + b_{glut1} - d_{glut1};$                                                             |
| 2        | $pgm.1 = \mathcal{K}_2^{(g)} * [HIF\_1] + b_{pgm.1} - d_{pgm.1};$                                                                                                                                     |
| 3        | $hk = \mathcal{K}_3^{(g)} * [HIF\_1] * [P13K] * [AKT] * [MYC] * [mTOR] + b_{hk} - d_{hk};$                                                                                                            |
| 4        | $g6Pase = \mathcal{K}_4^{(g)} * [HIF\_1] / ((1 + \mathcal{F}_2^{(g)} * [AKT]) * (1 + \mathcal{F}_3^{(g)} * [AMPK])) + b_{g6Pase} - d_{g6Pase};$                                                       |
| 5        | $pgi = \mathcal{K}_5^{(g)} * [HIF\_1] * [MYC] * [AKT] * [mTOR] + b_{pgi} - d_{pgi};$                                                                                                                  |
| 6        | $pfk1 = (\mathcal{K}_6^{(g)} * [HIF\_1] * [MYC] * [P13K] * [AKT] * [AMPK] * [mTOR]) / (1 + \mathcal{F}_4^{(g)} * [p53]) + b_{pfk1} - d_{pfk1};$                                                       |
| 7        | $f16Bpase = (\mathcal{K}_7^{(g)} * [ERK]) + b_{f16Bpase} - d_{f16Bpase};$                                                                                                                             |
| 8        | $pfk2 = (\mathcal{K}_8^{(g)} * [HIF\_1] * [MYC] * [P13K] * [AKT] * [AMPK]) / (1 + \mathcal{F}_5^{(g)} * [p53]) + b_{pfk2} - d_{pfk2};$                                                                |
| 9        | $f26Bpase = (\mathcal{K}_9^{(g)} * [E2F1] * [ERK] * [MYC]) + b_{f26Bpase} - d_{f26Bpase};$                                                                                                            |
| 10       | $ald = \mathcal{K}_{10}^{(g)} * [HIF\_1] * [MYC] * [AKT] * [mTOR] + b_{ald} - d_{ald};$                                                                                                               |
| 11       | $tpi = \mathcal{K}_{11}^{(g)} * [mTOR] + b_{tpi} - d_{tpi};$                                                                                                                                          |
| 12       | $g3Pdh = \mathcal{K}_{12}^{(g)} * [HIF\_1] * [MYC] * [AKT] + b_{g3Pdh} - d_{g3Pdh};$                                                                                                                  |
| 13       | $pglck = \mathcal{K}_{13}^{(g)} * [HIF\_1] * [MYC] * [AKT] * [mTOR] + b_{pglck} - d_{pglck};$                                                                                                         |
| 14       | $pglcm = \mathcal{K}_{14}^{(g)} * [HIF\_1] * [mTOR] + b_{pglcm} - d_{pglcm};$                                                                                                                         |
| 15       | $enl = \mathcal{K}_{15}^{(g)} * [HIF\_1] * [MYC] + b_{enl} - d_{enl};$                                                                                                                                |
| 16       | $pk = (\mathcal{K}_{16}^{(g)} * [HIF\_1]) / (1 + \mathcal{F}_6^{(g)} * [GF]) + b_{pk} - d_{pk};$                                                                                                      |
| 17       | $ldh = \mathcal{K}_{17}^{(g)} * [HIF\_1] * [MYC] * [mTOR] + b_{ldh} - d_{ldh};$                                                                                                                       |
| 18       | $pyrd = (\mathcal{K}_{18}^{(g)} * [MYC] * [AKT]) / ((1 + \mathcal{F}_7^{(g)} * [HIF\_1]) * (1 + \mathcal{F}_8^{(g)} * [p53])) + b_{pyrd} - d_{pyrd};$                                                 |
| 19       | $Acyl.coa.syn = (\mathcal{K}_{19}^{(g)} * [ERK] * [MYC] * [STAT3]) + b_{Acyl.coa.syn} - d_{Acyl.coa.syn};$                                                                                            |
| 20       | $fa.synthase = (\mathcal{K}_{20}^{(g)} * [ERK] * [MYC] * [E2F1] * [AKT]) / (1 + \mathcal{F}_9^{(g)} * [AMPK]) + b_{fa.synthase} - d_{fa.synthase};$                                                   |
| 21       | $pyr.crbxylase = (\mathcal{K}_{21}^{(g)} * [STAT3] * [NF-\kappa B] * [p53] * [MYC] * [E2F1]) + b_{pyr.crbxylase} - d_{pyr.crbxylase};$                                                                |
| 22       | $pep.crbxykinase1 = (\mathcal{K}_{22}^{(g)} * [NF-\kappa B] * [ERK]) / ((1 + \mathcal{F}_{10}^{(g)} * [AKT]) * (1 + \mathcal{F}_{11}^{(g)} * [AMPK])) + b_{pep.crbxykinase1} - d_{pep.crbxykinase1};$ |
| 23       | $cit.synthase = (\mathcal{K}_{23}^{(g)} * [RORa]) + b_{cit.synthase} - d_{cit.synthase};$                                                                                                             |
| 24       | $actnase = (\mathcal{K}_{24}^{(g)} * [HIF-1]) + b_{actnase} - d_{actnase};$                                                                                                                           |
| 25       | $isocit.deh = (\mathcal{K}_{25}^{(g)} * [MYC]) + b_{isocit.deh} - d_{isocit.deh};$                                                                                                                    |
| 26       | $KG.deh.cmp = (\mathcal{K}_{26}^{(g)} * [STAT3] * [MYC]) + b_{KG.deh.cmp} - d_{KG.deh.cmp};$                                                                                                          |
| 27       | $succ.coa.synthase = (\mathcal{K}_{27}^{(g)} * [MYC] * [E2F1] * [ERK]) + b_{succ.coa.synthase} - d_{succ.coa.synthase};$                                                                              |
| 28       | $succ.deh = ((\mathcal{K}_{28}^{(g)} * [MYC] * [E2F1] * [p53] * [AKT]) / (1 + \mathcal{F}_{13}^{(g)} * [LPS])) + b_{succ.deh} - d_{succ.deh};$                                                        |
| 29       | $frmase = (\mathcal{K}_{29}^{(g)} * [MYC] * [E2F1] * [p53] * [NF-\kappa B]) + b_{frmase} - d_{frmase};$                                                                                               |
| 30       | $mal.deh = (\mathcal{K}_{30}^{(g)} * [E2F1] * [ERK]) + b_{mal.deh} - d_{mal.deh};$                                                                                                                    |
| 31       | $g6Pdeh = (\mathcal{K}_{31}^{(g)} * [mTOR]) / (1 + \mathcal{F}_{12}^{(g)} * [p53]) + b_{g6Pdeh} - d_{g6Pdeh};$                                                                                        |
| 32       | $pglc6 = \mathcal{K}_{32}^{(g)} * [p53] + b_{pglc6} - d_{pglc6};$                                                                                                                                     |
| 33       | $phglc.deh = \mathcal{K}_{33}^{(g)} * [p53] * [mTOR] + b_{phglc.deh} - d_{phglc.deh};$                                                                                                                |
| 34       | $r5Piso.A = (\mathcal{K}_{34}^{(g)} * [ERK] * [AKT]) + b_{r5Piso.A} - d_{r5Piso.A};$                                                                                                                  |
| 35       | $rbls.5P.3ep = \mathcal{K}_{35}^{(g)} * [mTOR] + b_{rbls.5P.3ep} - d_{rbls.5P.3ep};$                                                                                                                  |
| 36       | $trkl = \mathcal{K}_{36}^{(g)} * [mTOR] + b_{trkl} - d_{trkl};$                                                                                                                                       |
| 37       | $trsd1 = (\mathcal{K}_{37}^{(g)} * [E2F1] * [STAT3] * [MYC]) + b_{trsd1} - d_{trsd1};$                                                                                                                |

**Table S-3** Reaction list of central carbon metabolic (CCM) pathway under consideration in the main article.

| Pathway    | Reaction no. | Reaction                                                      | Initial rate   | Catalyzing enzyme                             |
|------------|--------------|---------------------------------------------------------------|----------------|-----------------------------------------------|
|            | 1            | Glucose_ext => Glucose                                        | $r_0^{(m)}$    | Glut1                                         |
|            | 2            | Glucose-1P => Glucose-6P                                      | $r_1^{(m)}$    | Phosphoglucomutase.1                          |
|            | 3            | Glucose-6P => Glucose-1P                                      | $r_2^{(m)}$    | Phosphoglucomutase.1                          |
|            | 4            | Glucose + ATP => Glucose-6P + ADP                             | $r_3^{(m)}$    | Hexokinase                                    |
|            | 5            | Glucose-6P => Glucose                                         | $r_4^{(m)}$    | Glucose-6-phosphatase                         |
|            | 6            | Glucose-6P => Fructose-6P                                     | $r_5^{(m)}$    | Phosphoglucoisomerase                         |
|            | 7            | Fructose-6P => Glucose-6P                                     | $r_6^{(m)}$    | Phosphoglucoisomerase                         |
|            | 8            | Fructose-6P + ATP => Fructose-1,6BP + ADP                     | $r_7^{(m)}$    | Phosphofructokinase.1                         |
|            | 9            | Fructose-1,6BP => Fructose-6P                                 | $r_8^{(m)}$    | Fructose-1,6-bisphosphatase                   |
| G          | 10           | Fructose-6P + ATP => Fructose-2,6BP + ADP                     | $r_9^{(m)}$    | Phosphofructokinase.2                         |
| L          | 11           | Fructose-2,6BP => Fructose-6P                                 | $r_{10}^{(m)}$ | Fructose-2,6-bisphosphatase                   |
| Y          | 12           | Fructose-1,6BP => DHAP + GA-3P                                | $r_{11}^{(m)}$ | Aldolase                                      |
| C          | 13           | DHAP + GA-3P => Fructose-1,6BP                                | $r_{12}^{(m)}$ | Aldolase                                      |
| O          | 14           | DHAP => GA-3P                                                 | $r_{13}^{(m)}$ | Triose.phosphate.isomerase                    |
| L          | 15           | GA-3P => DHAP                                                 | $r_{14}^{(m)}$ | Triose.phosphate.isomerase                    |
| Y          | 16           | GA-3P + NAD => 1,3_BPG + NADH                                 | $r_{15}^{(m)}$ | Glyceraldehyde-3-phosphate.dehydrogenase      |
| S          | 17           | 1,3_BPG + NADH => GA-3P + NAD                                 | $r_{16}^{(m)}$ | Glyceraldehyde-3-phosphate.dehydrogenase      |
| I          | 18           | 1,3_BPG + ADP => 3-PG + ATP                                   | $r_{17}^{(m)}$ | Phosphoglycerate_kinase                       |
| S          | 19           | 3-PG => 1,3BPG                                                | $r_{18}^{(m)}$ | Phosphoglycerate_kinase                       |
|            | 20           | 3-PG => 2-PG                                                  | $r_{19}^{(m)}$ | Phosphoglycerate_mutase                       |
|            | 21           | 2-PG => 3-PG                                                  | $r_{20}^{(m)}$ | Phosphoglycerate_mutase                       |
|            | 22           | 2-PG => PEP                                                   | $r_{21}^{(m)}$ | Enolase                                       |
|            | 23           | PEP => 2-PG                                                   | $r_{22}^{(m)}$ | Enolase                                       |
|            | 24           | PEP + ADP => PYR + ATP                                        | $r_{23}^{(m)}$ | Pyruvate_kinase                               |
|            | 25           | PYR + NADH => LACTATE + NAD                                   | $r_{24}^{(m)}$ | Lactate.dehydrogenase                         |
|            | 26           | PYR + CoA + NAD => Acetyl-CoA + NADH + CO2                    | $r_{25}^{(m)}$ | Pyruvate.dehydrogenase                        |
| Fatty Acid | 27           | FFA + ATP + FAD + NAD => AcetylCoA + NADH + FADH + ADP        | $r_{26}^{(m)}$ | Acyl-CoA_synthetase                           |
|            | 28           | AcetylCoA + NADH + FADH + ADP => FFA + ATP + FAD + NAD        | $r_{27}^{(m)}$ | Fatty_acid_synthase                           |
|            | 29           | PYR + ATP => OAA + ADP                                        | $r_{28}^{(m)}$ | Pyruvate_carboxylase                          |
|            | 30           | OAA + ATP => PEP + ADP                                        | $r_{29}^{(m)}$ | Phosphoenolpyruvate_carboxykinase.1           |
|            | 31           | Acetyl-CoA + OAA => Citrate + CoA-SH                          | $r_{30}^{(m)}$ | Citrate_synthase                              |
|            | 32           | Citrate => Isocitrate                                         | $r_{31}^{(m)}$ | Aconitase.1                                   |
| T          | 33           | Isocitrate => Citrate                                         | $r_{32}^{(m)}$ | Aconitase.1                                   |
| C          | 34           | Isocitrate + NAD => $\alpha$ -Ketoglutarate + NADH            | $r_{33}^{(m)}$ | Isocitrate.dehydrogenase                      |
| A          | 35           | $\alpha$ -Ketoglutarate + NAD + CoA-SH => Succinyl-CoA + NADH | $r_{34}^{(m)}$ | $\alpha$ -Ketoglutarate.dehydrogenase_complex |
|            | 36           | Succinyl-CoA + ADP => Succinate + ATP                         | $r_{35}^{(m)}$ | Succinyl.CoA_synthetase                       |
|            | 37           | Succinate => Succinyl-CoA                                     | $r_{36}^{(m)}$ | Succinyl.CoA_synthetase                       |
|            | 38           | Succinate + FAD => Fumarate + FADH                            | $r_{37}^{(m)}$ | Succinate.dehydrogenase                       |
|            | 39           | Fumarate => Malate                                            | $r_{38}^{(m)}$ | Fumarase                                      |
|            | 40           | Malate + NAD => Oxaloacetate + NADH                           | $r_{39}^{(m)}$ | Malate.dehydrogenase                          |
|            | 41           | Glucose-6P + NADP => Glucono-1,5-lactone-6P + NADPH           | $r_{40}^{(m)}$ | Glucose-6-phosphate.dehydrogenase             |
|            | 42           | Glucono-1,5-lactone-6P => Gluconate-6P                        | $r_{41}^{(m)}$ | 6-phosphogluconolactonase                     |
|            | 43           | Gluconate-6P + NADP => Ribulose-5P + NADPH                    | $r_{42}^{(m)}$ | Phosphogluconate.dehydrogenase                |
|            | 44           | Ribulose-5P => Ribose-5P                                      | $r_{43}^{(m)}$ | Ribose 5-phosphate.isomerise_A                |
|            | 45           | Ribulose-5P => Xylulose-5P                                    | $r_{44}^{(m)}$ | Ribulose-5-phosphate-3-epimerase              |
| P          | 46           | Ribose-5P + Xylulose-5P => Sedoheptulose-7P + GA-3P           | $r_{45}^{(m)}$ | Transketolase                                 |
| P          | 47           | Sedoheptulose-7P + GA-3P => Erythrose-4P + Fructose-6P        | $r_{46}^{(m)}$ | Transaldolase.1                               |
| P          | 48           | Erythrose-4P + Xylulose-5P => GA-3P + Fructose-6P             | $r_{47}^{(m)}$ | Transketolase                                 |
|            | 49           | GA-3P + Fructose-6P => Erythrose-4P + Xylulose-5P             | $r_{48}^{(m)}$ | Transketolase                                 |

A. Supplementary Tables

Table S-4 Activation and inhibition of the reactions considered in Table S-3.

| Reaction no. | Activated by             | Inhibited by                                    | Kinetic rate constants | Michaelis-Menten constants | Feedback constants                                                                                 |
|--------------|--------------------------|-------------------------------------------------|------------------------|----------------------------|----------------------------------------------------------------------------------------------------|
| 1            |                          |                                                 | $K_1^{(m)}$            | $K_3^{(m)}$                | $J_1^{(m)}$                                                                                        |
| 2            | Glucose-1,6BP            |                                                 | $K_2^{(m)}$            | $K_4^{(m)}$                | $J_2^{(m)}$                                                                                        |
| 3            | Glucose-1,6BP            |                                                 | $K_3^{(m)}$            | $K_5^{(m)}$                | $J_3^{(m)}, J_4^{(m)}, J_5^{(m)}, J_6^{(m)}$                                                       |
| 4            | Insulin, ADP             | G6P, Acetyl-CoA                                 | $K_4^{(m)}$            | $K_6^{(m)}$                | $J_7^{(m)}$                                                                                        |
| 5            | G6P                      |                                                 | $K_5^{(m)}$            | $K_7^{(m)}$                | $J_8^{(m)}$                                                                                        |
| 6            |                          | Fructose-1,6BP, Gluconate-6P, Erythrose-4P      | $K_6^{(m)}$            | $K_8^{(m)}$                | $J_9^{(m)}, J_{10}^{(m)}, J_{11}^{(m)}$                                                            |
| 7            |                          | Fructose-1,6BP, Gluconate-6P, Erythrose-4P      | $K_7^{(m)}$            | $K_9^{(m)}$                | $J_{12}^{(m)}, J_{13}^{(m)}$                                                                       |
| 8            | AMP, Fructose-2,6BP      | ATP, Citrate                                    | $K_8^{(m)}$            | $K_{10}^{(m)}$             | $J_{14}^{(m)}, J_{15}^{(m)}, J_{16}^{(m)}, J_{17}^{(m)}$                                           |
| 9            |                          | F2,6BP, AMP                                     | $K_9^{(m)}$            | $K_{11}^{(m)}$             | $J_{18}^{(m)}, J_{19}^{(m)}$                                                                       |
| 10           | Fructose-6P              | cAMP                                            | $K_{10}^{(m)}$         | $K_{12}^{(m)}$             | $J_{20}^{(m)}, J_{21}^{(m)}$                                                                       |
| 11           | cAMP                     | Fructose-6-phosphate                            | $K_{11}^{(m)}$         | $K_{13}^{(m)}$             | $J_{22}^{(m)}, J_{23}^{(m)}$                                                                       |
| 12           |                          |                                                 | $K_{12}^{(m)}$         | $K_{14}^{(m)}$             |                                                                                                    |
| 13           |                          |                                                 | $K_{13}^{(m)}$         | $K_{15}^{(m)}$             |                                                                                                    |
| 14           |                          |                                                 | $K_{14}^{(m)}$         | $K_{16}^{(m)}$             |                                                                                                    |
| 15           |                          |                                                 | $K_{15}^{(m)}$         | $K_{17}^{(m)}$             |                                                                                                    |
| 16           |                          |                                                 | $K_{16}^{(m)}$         | $K_{18}^{(m)}$             |                                                                                                    |
| 17           |                          |                                                 | $K_{17}^{(m)}$         | $K_{19}^{(m)}$             |                                                                                                    |
| 18           |                          |                                                 | $K_{18}^{(m)}$         | $K_{20}^{(m)}$             |                                                                                                    |
| 19           |                          |                                                 | $K_{19}^{(m)}$         | $K_{21}^{(m)}$             |                                                                                                    |
| 20           | 2,3BPG                   |                                                 | $K_{20}^{(m)}$         | $K_{22}^{(m)}$             | $J_{24}^{(m)}$                                                                                     |
| 21           | 2,3BPG                   |                                                 | $K_{21}^{(m)}$         | $K_{23}^{(m)}$             | $J_{25}^{(m)}$                                                                                     |
| 22           |                          |                                                 | $K_{22}^{(m)}$         | $K_{24}^{(m)}$             |                                                                                                    |
| 23           |                          |                                                 | $K_{23}^{(m)}$         | $K_{25}^{(m)}$             |                                                                                                    |
| 24           | Insulin, Fructose-1,6BP  | ATP, Acetyl-CoA, Alanine, Gluconog-, Fatty Acid | $K_{24}^{(m)}$         | $K_{26}^{(m)}$             | $J_{26}^{(m)}, J_{27}^{(m)}, J_{28}^{(m)}, J_{29}^{(m)}, J_{30}^{(m)}, J_{31}^{(m)}, J_{32}^{(m)}$ |
| 25           |                          |                                                 | $K_{25}^{(m)}$         | $K_{27}^{(m)}$             |                                                                                                    |
| 26           | Ca, Insulin              |                                                 | $K_{26}^{(m)}$         | $K_{28}^{(m)}$             |                                                                                                    |
| 27           |                          |                                                 | $K_{27}^{(m)}$         | $K_{29}^{(m)}$             |                                                                                                    |
| 28           |                          |                                                 | $K_{28}^{(m)}$         | $K_{30}^{(m)}$             |                                                                                                    |
| 29           | Acetyl-CoA               | Insulin                                         | $K_{29}^{(m)}$         | $K_{31}^{(m)}$             | $J_{33}^{(m)}$                                                                                     |
| 30           | Gluconog                 | ATP, Acetyl-CoA                                 | $K_{30}^{(m)}$         | $K_{32}^{(m)}$             | $J_{34}^{(m)}, J_{35}^{(m)}$                                                                       |
| 31           | acetyl-CoA, Oxaloacetate | fluoro-acetate                                  | $K_{31}^{(m)}$         | $K_{33}^{(m)}$             | $J_{36}^{(m)}, J_{37}^{(m)}, J_{38}^{(m)}, J_{39}^{(m)}$                                           |
| 32           |                          | fluoro-acetate                                  | $K_{32}^{(m)}$         | $K_{34}^{(m)}$             | $J_{40}^{(m)}$                                                                                     |
| 33           |                          | ATP, NADH                                       | $K_{33}^{(m)}$         | $K_{35}^{(m)}$             | $J_{41}^{(m)}, J_{42}^{(m)}, J_{43}^{(m)}, J_{44}^{(m)}, J_{45}^{(m)}$                             |
| 34           | isocitrate, ADP, Ca      | ATP, Succinyl-CoA                               | $K_{34}^{(m)}$         | $K_{36}^{(m)}$             |                                                                                                    |
| 35           |                          |                                                 | $K_{35}^{(m)}$         | $K_{37}^{(m)}$             |                                                                                                    |
| 36           |                          |                                                 | $K_{36}^{(m)}$         | $K_{38}^{(m)}$             |                                                                                                    |
| 37           |                          |                                                 | $K_{37}^{(m)}$         | $K_{39}^{(m)}$             | $J_{46}^{(m)}, J_{47}^{(m)}$                                                                       |
| 38           |                          | Carboxin, therylthiofluorocetone, malonate      | $K_{38}^{(m)}$         | $K_{40}^{(m)}$             | $J_{48}^{(m)}$                                                                                     |
| 39           |                          |                                                 | $K_{39}^{(m)}$         | $K_{41}^{(m)}$             |                                                                                                    |
| 40           |                          | Oxaloacetate                                    | $K_{40}^{(m)}$         | $K_{42}^{(m)}$             | $J_{49}^{(m)}$                                                                                     |
| 41           |                          | NADPH                                           | $K_{41}^{(m)}$         | $K_{43}^{(m)}$             | $J_{50}^{(m)}$                                                                                     |
| 42           |                          |                                                 | $K_{42}^{(m)}$         | $K_{44}^{(m)}$             |                                                                                                    |
| 43           |                          |                                                 | $K_{43}^{(m)}$         | $K_{45}^{(m)}$             |                                                                                                    |
| 44           |                          |                                                 | $K_{44}^{(m)}$         | $K_{46}^{(m)}$             |                                                                                                    |
| 45           |                          |                                                 | $K_{45}^{(m)}$         | $K_{47}^{(m)}$             |                                                                                                    |
| 46           |                          |                                                 | $K_{46}^{(m)}$         | $K_{48}^{(m)}$             |                                                                                                    |
| 47           |                          |                                                 | $K_{47}^{(m)}$         | $K_{49}^{(m)}$             |                                                                                                    |
| 48           |                          |                                                 | $K_{48}^{(m)}$         | $K_{50}^{(m)}$             |                                                                                                    |
| 49           |                          |                                                 | $K_{49}^{(m)}$         | $K_{51}^{(m)}$             |                                                                                                    |











**Table S-9** Initial values of different molecules involved in integrated metabolic, signaling and gene regulatory network under consideration in the main article. Here, we have generated different samples to test the validity our model with several initial values in [0,1]. However, in this table we have provided one of the sets of initial values, that we have considered.

| Pathway type    | Name of molecule           | Initial value |
|-----------------|----------------------------|---------------|
| Metabolic       | Glucose-1P                 | 0.7333        |
|                 | Glucose-6P                 | 0.7152        |
|                 | Glucose                    | 0.6143        |
|                 | Fructose-6P                | 0.922         |
|                 | Fructose-1,6BP             | 0.6691        |
|                 | Fructose-2,6BP             | 0.1878        |
|                 | Dihydroxyacetone phosphate | 0.3506        |
|                 | Glyceraldehyde-3P          | 0.5922        |
|                 | 1,3-Bisphosphoglycerate    | 0.9618        |
|                 | 3-Phosphoglycerate         | 0.9684        |
|                 | 2-Phosphoglycerate         | 0.2419        |
|                 | Phosphoenolpyruvate        | 0.9735        |
|                 | Pyruvate                   | 0.9615        |
|                 | Lactate                    | 0.5368        |
|                 | Acetylc-CoA                | 0.8203        |
|                 | Oxaloacetate               | 0.4277        |
|                 | Citrate                    | 0.4796        |
|                 | Isocitrate                 | 0.9242        |
|                 | $\alpha$ -Ketoglutarate    | 0.813         |
|                 | Succinyl-CoA               | 0.9635        |
|                 | Succinate                  | 0.6902        |
|                 | Fumarate                   | 0.2321        |
|                 | Malate                     | 0.8642        |
|                 | Glucono-1,5-lactone-6P     | 0.9406        |
|                 | Gluconate-6P               | 0.7109        |
|                 | Ribulose-5P                | 0.782         |
|                 | Ribose-5P                  | 0.7688        |
|                 | Xylulose-5P                | 0.453         |
|                 | Sedoheptulose-7P           | 0.6899        |
|                 | Erythrose-4P               | 0.2541        |
|                 | ATP                        | 0.7354        |
|                 | ADP                        | 0.5286        |
|                 | NADH                       | 0.3492        |
|                 | NAD                        | 0.1416        |
| CoA             | 0.1874                     |               |
| CO <sub>2</sub> | 0.8411                     |               |
| FFA             | 0.7253                     |               |
| FAD             | 0.3854                     |               |

Table S-9 continued from previous page

| Pathway type           | Name of molecule            | Initial value |
|------------------------|-----------------------------|---------------|
|                        | FADH                        | 0.9552        |
|                        | CoA-SH                      | 0.131         |
|                        | NADPH                       | 0.4949        |
| <b>Signaling</b>       | STAT3                       | 0.5316        |
|                        | NF- $\kappa$ B              | 0.8212        |
|                        | ERK                         | 0.3051        |
|                        | P13K                        | 0.5483        |
|                        | AKT                         | 0.9108        |
|                        | mTOR                        | 0.6172        |
|                        | MNK                         | 0.8607        |
|                        | HIF-1                       | 0.3648        |
|                        | elf4E                       | 0.6274        |
|                        | Ras                         | 0.3221        |
|                        | TRAF6                       | 0.6998        |
|                        | Raf-1                       | 0.1751        |
|                        | ROS                         | 0.6634        |
|                        | Rheb                        | 0.6949        |
|                        | PTEN                        | 0.7568        |
|                        | VHL                         | 0.5017        |
|                        | PHD                         | 0.5841        |
|                        | AMPK                        | 0.7921        |
|                        | PDK1                        | 0.6233        |
|                        | PKCs                        | 0.9355        |
|                        | BCL-X                       | 0.6221        |
|                        | FASL                        | 0.1153        |
|                        | MDM2                        | 0.2088        |
|                        | p53                         | 0.8764        |
|                        | MDMX                        | 0.5359        |
|                        | MYC                         | 0.8604        |
|                        | TIGAR                       | 0.2885        |
|                        | MTORC2                      | 0.5971        |
|                        | MTORC1                      | 0.6669        |
| <b>Gene Regulatory</b> | Glut 1                      | 0.968         |
|                        | Phosphoglucomutase 1        | 0.4129        |
|                        | Hexokinase                  | 0.735         |
|                        | Glucose-6-phosphatase       | 0.6275        |
|                        | Phosphoglucoisomerase       | 0.3359        |
|                        | Phosphofructokinase 1       | 0.74          |
|                        | Fructose-1,6-bisphosphatase | 0.7794        |
|                        | Phosphofructokinase 2       | 0.3185        |
|                        | Fructose-2,6-bisphosphatase | 0.4982        |

Table S-9 continued from previous page

| Pathway type | Name of molecule                              | Initial value |
|--------------|-----------------------------------------------|---------------|
|              | Aldolase                                      | 0.719         |
|              | Triose phosphate isomerase                    | 0.4233        |
|              | Glyceraldehyde-3-phosphate dehydrogenase      | 0.7627        |
|              | Phosphoglycerate kinase                       | 0.4552        |
|              | Phosphoglycerate mutase                       | 0.7151        |
|              | Enolase                                       | 0.7336        |
|              | Pyruvate kinase                               | 0.6981        |
|              | Lactate dehydrogenase                         | 0.1176        |
|              | Pyruvate dehydrogenase                        | 0.3978        |
|              | Acyl-CoA synthetase                           | 0.4819        |
|              | Fatty acid synthase                           | 0.3432        |
|              | Pyruvate carboxylase                          | 0.8773        |
|              | Phosphoenolpyruvate carboxykinase 1           | 0.8395        |
|              | Citrate synthase                              | 0.8869        |
|              | Aconitase 1                                   | 0.899         |
|              | Isocitrate dehydrogenase                      | 0.8521        |
|              | $\alpha$ -Ketoglutarate dehydrogenase complex | 0.7922        |
|              | Succinyl CoA synthetase                       | 0.8971        |
|              | Succinate dehydrogenase                       | 0.8277        |
|              | Fumarase                                      | 0.7796        |
|              | Malate dehydrogenase                          | 0.4397        |
|              | Glucose-6-phosphate dehydrogenase             | 0.2944        |
|              | 6-phosphogluconolactonase                     | 0.8114        |
|              | Phosphogluconate dehydrogenase                | 0.9544        |
|              | Ribose 5-phosphate isomerase A                | 0.3948        |
|              | Ribulose-5-phosphate-3-epimerase              | 0.7041        |
|              | Transketolase                                 | 0.4948        |
|              | Transaldolase 1                               | 0.8502        |

**Table S-10** Abbreviations of different molecules used in Tables S-1, S-2, S-3, S-4, S-5, S-6, S-7 and S-8. The names of the molecules involved in the signaling pathway under consideration are same as their abbreviations.

| Pathway type | Full name of molecule      | Abbreviation |
|--------------|----------------------------|--------------|
| Metabolic    | Glucose-1P                 | glc.1P       |
|              | Glucose-6P                 | glc.6P       |
|              | Glucose                    | glc          |
|              | Fructose-6P                | f.6P         |
|              | Fructose-1,6BP             | f.16_BP      |
|              | Fructose-2,6BP             | f.26_BP      |
|              | Dihydroxyacetone phosphate | dhap         |

Table S-10 continued from previous page

| Pathway type           | Full name of molecule                       | Abbreviation    |
|------------------------|---------------------------------------------|-----------------|
|                        | Glyceraldehyde-3P                           | ga_3P           |
|                        | 1,3-Bisphosphoglycerate                     | 1,3.BPG         |
|                        | 3-Phosphoglycerate                          | PG_3            |
|                        | 2-Phosphoglycerate                          | PG_2            |
|                        | Phosphoenolpyruvate                         | PEP             |
|                        | Pyruvate                                    | PYR             |
|                        | Lactate                                     | LACTATE         |
|                        | Acetyl-CoA                                  | Ace_coa         |
|                        | Oxaloacetate                                | OAA             |
|                        | Citrate                                     | Citrate         |
|                        | Isocitrate                                  | Isocitrate      |
|                        | $\alpha$ -Ketoglutarate                     | alpha_KG        |
|                        | Succinyl-CoA                                | Succ_coa        |
|                        | Succinate                                   | succinate       |
|                        | Fumarate                                    | fumarate        |
|                        | Malate                                      | malate          |
|                        | Glucono-1,5-lactone-6P                      | gl_15_16P       |
|                        | Gluconate-6P                                | gl_6P           |
|                        | Ribulose-5P                                 | rbls_5P         |
|                        | Ribose-5P                                   | rbs_5P          |
|                        | Xylulose-5P                                 | xyl_5P          |
|                        | Sedoheptulose-7P                            | sdhl_7P         |
|                        | Erythrose-4P                                | eryt_4P         |
|                        | ATP                                         | ATP             |
|                        | ADP                                         | ADP             |
|                        | NADH                                        | NADH            |
|                        | NAD                                         | NAD             |
|                        | CoA                                         | COA             |
|                        | CO <sub>2</sub>                             | CO <sub>2</sub> |
|                        | FFA                                         | FFA             |
|                        | FAD                                         | FAD             |
|                        | FADH                                        | FADH            |
|                        | CoA-SH                                      | COA.SH          |
|                        | NADPH                                       | NADPH           |
| <b>Gene Regulatory</b> | Glut 1                                      | glut1           |
|                        | Phosphoglucomutase 1                        | pgm.1           |
|                        | Hexokinase                                  | hk              |
|                        | Glucose-6-phosphatase                       | g6Pase          |
|                        | Phosphoglucoisomerase/ Glucose 6P isomerase | pgi             |
|                        | Phosphofructokinase 1                       | pfk1            |
|                        | Fructose-1,6-bisphosphatase                 | f16Bpase        |

Table S-10 continued from previous page

| Pathway type | Full name of molecule                         | Abbreviation      |
|--------------|-----------------------------------------------|-------------------|
|              | Phosphofructokinase 2                         | pfk2              |
|              | Fructose-2,6-bisphosphatase                   | f26Bpase          |
|              | Aldolase                                      | ald               |
|              | Triose phosphate isomerase                    | tpi               |
|              | Glyceraldehyde-3-phosphate dehydrogenase      | g3Pdh             |
|              | Phosphoglycerate kinase                       | pglck             |
|              | Phosphoglycerate mutase                       | pglcm             |
|              | Enolase                                       | enl               |
|              | Pyruvate kinase                               | pk                |
|              | Lactate dehydrogenase                         | ldh               |
|              | Pyruvate dehydrogenase                        | pyrd              |
|              | Acyl-CoA synthetase                           | Acyl.coa_syn      |
|              | Fatty acid synthase                           | fa_synthase       |
|              | Pyruvate carboxylase                          | pyr_crbxylase     |
|              | Phosphoenolpyruvate carboxykinase 1           | pep_crbxykinase1  |
|              | Citrate synthase                              | cit_synthase      |
|              | Aconitase 1                                   | actnase           |
|              | Isocitrate dehydrogenase                      | isocit_deh        |
|              | $\alpha$ -Ketoglutarate dehydrogenase complex | KG_deh_cmp        |
|              | Succinyl CoA synthetase                       | succ.coa_synthase |
|              | Succinate dehydrogenase                       | succ_deh          |
|              | Fumarase                                      | frmase            |
|              | Malate dehydrogenase                          | mal_deh           |
|              | Glucose-6-phosphate dehydrogenase             | g6Pdeh            |
|              | 6-phosphogluconolactonase                     | pglc6             |
|              | Phosphogluconate dehydrogenase                | phglc_deh         |
|              | Ribose 5-phosphate isomerase A                | r5Piso_A          |
|              | Ribulose-5-phosphate-3-epimerase              | rbls_5P_3ep       |
|              | Transketolase                                 | trkl              |
|              | Transaldolase 1                               | trsd11            |

**Table S-11** The external inputs under consideration in the main article.

| Sl. no. | External input Name      | Symbol   |
|---------|--------------------------|----------|
| 1       | IL6                      | $u_1$    |
| 2       | LPS                      | $u_2$    |
| 3       | IFN <sub>y</sub>         | $u_3$    |
| 4       | TNF                      | $u_4$    |
| 5       | IL1                      | $u_5$    |
| 6       | GF                       | $u_6$    |
| 7       | GPCR                     | $u_7$    |
| 8       | cAMP                     | $u_8$    |
| 9       | LKB1                     | $u_9$    |
| 10      | RORa                     | $u_{10}$ |
| 11      | Wnt                      | $u_{11}$ |
| 12      | ATM + ATR = (ATMATR)     | $u_{12}$ |
| 13      | PTP                      | $u_{13}$ |
| 14      | MKP                      | $u_{14}$ |
| 15      | G12 + NF1 + p120GAF= GNP | $u_{15}$ |
| 16      | E2F1                     | $u_{16}$ |
| 17      | glc_ext                  | $u_{17}$ |
| 18      | NADP                     | $u_{18}$ |
| 19      | Insulin                  | $u_{19}$ |
| 20      | Glucagon                 | $u_{20}$ |
| 21      | Ca                       | $u_{21}$ |
| 22      | fluoro_acetate           | $u_{22}$ |
| 23      | Carboxin (ctm)           | $u_{23}$ |
| 24      | AMP                      | $u_{24}$ |
| 25      | Alanine                  | $u_{25}$ |
| 26      | glc_16BP                 | $u_{26}$ |
| 27      | BPG_23                   | $u_{27}$ |

**Table S-12** Values of kinetic rate constants involved in the modelling of integrated metabolic, signaling and gene regulatory network as described in the main article. The term  $\mathcal{K}_{40}^{(s)} - \mathcal{K}_{42}^{(s)}$  have not been used in simulation.

| Pathway type | Kinetic constant         | Value  |
|--------------|--------------------------|--------|
| Metabolic    | $\mathcal{K}_1^{(m)}$    | 0.09   |
|              | $\mathcal{K}_2^{(m)}$    | 0.01   |
|              | $\mathcal{K}_3^{(m)}$    | 0.09   |
|              | $\mathcal{K}_4^{(m)}$    | 0.01   |
|              | $\mathcal{K}_5^{(m)}$    | 0.0812 |
|              | $\mathcal{K}_6^{(m)}$    | 0.09   |
|              | $\mathcal{K}_7^{(m)}$    | 0.017  |
|              | $\mathcal{K}_8^{(m)}$    | 0.09   |
|              | $\mathcal{K}_9^{(m)}$    | 0.0766 |
|              | $\mathcal{K}_{10}^{(m)}$ | 0.0826 |
|              | $\mathcal{K}_{11}^{(m)}$ | 0.0899 |
|              | $\mathcal{K}_{12}^{(m)}$ | 0.076  |
|              | $\mathcal{K}_{13}^{(m)}$ | 0.0532 |
|              | $\mathcal{K}_{14}^{(m)}$ | 0.0755 |
|              | $\mathcal{K}_{15}^{(m)}$ | 0.0727 |
|              | $\mathcal{K}_{16}^{(m)}$ | 0.05   |
|              | $\mathcal{K}_{17}^{(m)}$ | 0.01   |
|              | $\mathcal{K}_{18}^{(m)}$ | 0.0809 |
|              | $\mathcal{K}_{19}^{(m)}$ | 0.0643 |
|              | $\mathcal{K}_{20}^{(m)}$ | 0.09   |
|              | $\mathcal{K}_{21}^{(m)}$ | 0.0852 |
|              | $\mathcal{K}_{22}^{(m)}$ | 0.0296 |
|              | $\mathcal{K}_{23}^{(m)}$ | 0.0818 |
|              | $\mathcal{K}_{24}^{(m)}$ | 0.0844 |
|              | $\mathcal{K}_{25}^{(m)}$ | 0.0881 |
|              | $\mathcal{K}_{26}^{(m)}$ | 0.0848 |
|              | $\mathcal{K}_{27}^{(m)}$ | 0.09   |
|              | $\mathcal{K}_{28}^{(m)}$ | 0.0757 |
|              | $\mathcal{K}_{29}^{(m)}$ | 0.0766 |
|              | $\mathcal{K}_{30}^{(m)}$ | 0.0752 |
|              | $\mathcal{K}_{31}^{(m)}$ | 0.0603 |
|              | $\mathcal{K}_{32}^{(m)}$ | 0.0191 |
|              | $\mathcal{K}_{33}^{(m)}$ | 0.0658 |
|              | $\mathcal{K}_{34}^{(m)}$ | 0.0792 |
|              | $\mathcal{K}_{35}^{(m)}$ | 0.069  |
|              | $\mathcal{K}_{36}^{(m)}$ | 0.0892 |

Table S-12 continued from previous page

| Pathway type | Kinetic constant         | Value  |
|--------------|--------------------------|--------|
|              | $\mathcal{K}_{37}^{(m)}$ | 0.0722 |
| Signaling    | $\mathcal{K}_1^{(s)}$    | 0.0013 |
|              | $\mathcal{K}_2^{(s)}$    | 0.0059 |
|              | $\mathcal{K}_3^{(s)}$    | 0.0039 |
|              | $\mathcal{K}_4^{(s)}$    | 0.0014 |
|              | $\mathcal{K}_5^{(s)}$    | 0.0049 |
|              | $\mathcal{K}_6^{(s)}$    | 0.0025 |
|              | $\mathcal{K}_7^{(s)}$    | 0.002  |
|              | $\mathcal{K}_8^{(s)}$    | 0.0016 |
|              | $\mathcal{K}_9^{(s)}$    | 0.0022 |
|              | $\mathcal{K}_{10}^{(s)}$ | 0.0025 |
|              | $\mathcal{K}_{11}^{(s)}$ | 0.0013 |
|              | $\mathcal{K}_{12}^{(s)}$ | 0.0061 |
|              | $\mathcal{K}_{13}^{(s)}$ | 0.0033 |
|              | $\mathcal{K}_{14}^{(s)}$ | 0.0053 |
|              | $\mathcal{K}_{15}^{(s)}$ | 0.0066 |
|              | $\mathcal{K}_{16}^{(s)}$ | 0.005  |
|              | $\mathcal{K}_{17}^{(s)}$ | 0.0053 |
|              | $\mathcal{K}_{18}^{(s)}$ | 0.0046 |
|              | $\mathcal{K}_{19}^{(s)}$ | 0.002  |
|              | $\mathcal{K}_{20}^{(s)}$ | 0.0049 |
|              | $\mathcal{K}_{21}^{(s)}$ | 0.0078 |
|              | $\mathcal{K}_{22}^{(s)}$ | 0.008  |
|              | $\mathcal{K}_{23}^{(s)}$ | 0.0032 |
|              | $\mathcal{K}_{24}^{(s)}$ | 0.0027 |
|              | $\mathcal{K}_{25}^{(s)}$ | 0.0055 |
|              | $\mathcal{K}_{26}^{(s)}$ | 0.0061 |
|              | $\mathcal{K}_{27}^{(s)}$ | 0.0043 |
|              | $\mathcal{K}_{28}^{(s)}$ | 0.0026 |
|              | $\mathcal{K}_{29}^{(s)}$ | 0.0086 |
|              | $\mathcal{K}_{31}^{(s)}$ | 0.0018 |
|              | $\mathcal{K}_{32}^{(s)}$ | 0.0021 |
|              | $\mathcal{K}_{33}^{(s)}$ | 0.0023 |
|              | $\mathcal{K}_{34}^{(s)}$ | 0.006  |
|              | $\mathcal{K}_{35}^{(s)}$ | 0.0056 |
|              | $\mathcal{K}_{36}^{(s)}$ | 0.0014 |
|              | $\mathcal{K}_{37}^{(s)}$ | 0.0084 |
|              | $\mathcal{K}_{38}^{(s)}$ | 0.0068 |
|              | $\mathcal{K}_{39}^{(s)}$ | 0.0069 |



Table S-12 continued from previous page

| Pathway type           | Kinetic constant         | Value     |
|------------------------|--------------------------|-----------|
|                        | $\mathcal{K}_{43}^{(s)}$ | 0.0015    |
|                        | $\mathcal{K}_{44}^{(s)}$ | 0.0079    |
|                        | $\mathcal{K}_{45}^{(s)}$ | 0.0085    |
|                        | $\mathcal{K}_{46}^{(s)}$ | 0.0089    |
|                        | $\mathcal{K}_{47}^{(s)}$ | 0.0079    |
|                        | $\mathcal{K}_{48}^{(s)}$ | 0.0073    |
|                        | $\mathcal{K}_{49}^{(s)}$ | 0.0051    |
|                        | $\mathcal{K}_{50}^{(s)}$ | 0.0024    |
|                        | $\mathcal{K}_{52}^{(s)}$ | 0.0042    |
|                        | $\mathcal{K}_{53}^{(s)}$ | 0.0021    |
|                        | $\mathcal{K}_{54}^{(s)}$ | 0.0012    |
| <b>Gene Regulatory</b> | $\mathcal{K}_1^{(g)}$    | 0.0007405 |
|                        | $\mathcal{K}_2^{(g)}$    | 0.0008736 |
|                        | $\mathcal{K}_3^{(g)}$    | 0.0006312 |
|                        | $\mathcal{K}_4^{(g)}$    | 0.0008237 |
|                        | $\mathcal{K}_5^{(g)}$    | 0.0008209 |
|                        | $\mathcal{K}_6^{(g)}$    | 0.0007686 |
|                        | $\mathcal{K}_7^{(g)}$    | 0.0006553 |
|                        | $\mathcal{K}_8^{(g)}$    | 0.0007792 |
|                        | $\mathcal{K}_9^{(g)}$    | 0.00069   |
|                        | $\mathcal{K}_{10}^{(g)}$ | 0.0006402 |
|                        | $\mathcal{K}_{11}^{(g)}$ | 0.0006638 |
|                        | $\mathcal{K}_{12}^{(g)}$ | 0.0008685 |
|                        | $\mathcal{K}_{13}^{(g)}$ | 0.0006214 |
|                        | $\mathcal{K}_{14}^{(g)}$ | 0.0006727 |
|                        | $\mathcal{K}_{15}^{(g)}$ | 0.0006161 |
|                        | $\mathcal{K}_{16}^{(g)}$ | 0.0007325 |
|                        | $\mathcal{K}_{17}^{(g)}$ | 0.000604  |
|                        | $\mathcal{K}_{18}^{(g)}$ | 0.0008692 |
|                        | $\mathcal{K}_{19}^{(g)}$ | 0.000659  |
|                        | $\mathcal{K}_{20}^{(g)}$ | 0.000628  |
|                        | $\mathcal{K}_{21}^{(g)}$ | 0.0006922 |
|                        | $\mathcal{K}_{22}^{(g)}$ | 0.0007368 |
|                        | $\mathcal{K}_{23}^{(g)}$ | 0.0006305 |
|                        | $\mathcal{K}_{24}^{(g)}$ | 0.0008986 |
|                        | $\mathcal{K}_{25}^{(g)}$ | 0.0006996 |
|                        | $\mathcal{K}_{26}^{(g)}$ | 0.0006892 |
|                        | $\mathcal{K}_{27}^{(g)}$ | 0.0006186 |

Table S-12 continued from previous page

| Pathway type | Kinetic constant         | Value     |
|--------------|--------------------------|-----------|
|              | $\mathcal{K}_{28}^{(g)}$ | 0.0006895 |
|              | $\mathcal{K}_{29}^{(g)}$ | 0.0006139 |
|              | $\mathcal{K}_{30}^{(g)}$ | 0.0007516 |
|              | $\mathcal{K}_{31}^{(g)}$ | 0.0008284 |
|              | $\mathcal{K}_{32}^{(g)}$ | 0.0007893 |
|              | $\mathcal{K}_{33}^{(g)}$ | 0.000627  |
|              | $\mathcal{K}_{34}^{(g)}$ | 0.0006243 |
|              | $\mathcal{K}_{35}^{(g)}$ | 0.0008332 |
|              | $\mathcal{K}_{36}^{(g)}$ | 0.0008715 |
|              | $\mathcal{K}_{37}^{(g)}$ | 0.0007601 |

**Table S-13** Values of basal production rate constants for different genes involved in the gene regulatory network (GRN) under consideration in the main article.

| GRN basal production rate constant   | Value     |
|--------------------------------------|-----------|
| <i>b<sub>glut1</sub></i>             | 0.0004939 |
| <i>b<sub>pgm.1</sub></i>             | 0.0004301 |
| <i>b<sub>hk</sub></i>                | 0.0004296 |
| <i>b<sub>g6Pase</sub></i>            | 0.0004333 |
| <i>b<sub>pgi</sub></i>               | 0.0004467 |
| <i>b<sub>pfk1</sub></i>              | 0.0004648 |
| <i>b<sub>f16Bpase</sub></i>          | 0.0004025 |
| <i>b<sub>pfk2</sub></i>              | 0.0004842 |
| <i>b<sub>f26Bpase</sub></i>          | 0.0004559 |
| <i>b<sub>ald</sub></i>               | 0.0004854 |
| <i>b<sub>tpi</sub></i>               | 0.0004348 |
| <i>b<sub>g3Pdh</sub></i>             | 0.0004446 |
| <i>b<sub>pglck</sub></i>             | 0.0004054 |
| <i>b<sub>pglcm</sub></i>             | 0.0004177 |
| <i>b<sub>enl</sub></i>               | 0.0004663 |
| <i>b<sub>pk</sub></i>                | 0.0004331 |
| <i>b<sub>ldh</sub></i>               | 0.0004898 |
| <i>b<sub>pyrd</sub></i>              | 0.0004118 |
| <i>b<sub>acyl_coa_syn</sub></i>      | 0.0004988 |
| <i>b<sub>fa_synthase</sub></i>       | 0.000454  |
| <i>b<sub>pyr_crbxylase</sub></i>     | 0.0004707 |
| <i>b<sub>pep_crbxykinase1</sub></i>  | 0.0004999 |
| <i>b<sub>cit_synthase</sub></i>      | 0.0004288 |
| <i>b<sub>actnase</sub></i>           | 0.0004415 |
| <i>b<sub>isocit_deh</sub></i>        | 0.0004465 |
| <i>b<sub>KG_deh_cmp</sub></i>        | 0.0004764 |
| <i>b<sub>succ_coa_synthase</sub></i> | 0.0004818 |
| <i>b<sub>succ_deh</sub></i>          | 0.00041   |
| <i>b<sub>frmase</sub></i>            | 0.0004178 |
| <i>b<sub>mal_deh</sub></i>           | 0.000436  |
| <i>b<sub>g6P_deh</sub></i>           | 0.0004057 |
| <i>b<sub>pglc6</sub></i>             | 0.0004522 |
| <i>b<sub>phglc_deh</sub></i>         | 0.0004336 |
| <i>b<sub>r5Piso_A</sub></i>          | 0.0004176 |
| <i>b<sub>rb1s_5P_3ep</sub></i>       | 0.0004209 |
| <i>b<sub>trkl</sub></i>              | 0.0004905 |
| <i>b<sub>trsd1.1</sub></i>           | 0.0004675 |

**Table S-14** Values of decay rate constants for different genes involved in the gene regulatory network (GRN) under consideration in the main article. Here, it should be mentioned that values of all feedback/binding constants under consideration in the main article have been taken as 0.9.

| GRN decay rate constant | Value     |
|-------------------------|-----------|
| $d_{glut1}$             | 0.0001109 |
| $d_{pgm.1}$             | 0.0001826 |
| $d_{hk}$                | 0.0001338 |
| $d_{g6Pase}$            | 0.0001294 |
| $d_{pgi}$               | 0.0001746 |
| $d_{pfk1}$              | 0.000101  |
| $d_{f16Bpase}$          | 0.0001048 |
| $d_{pfk2}$              | 0.0001668 |
| $d_{f26Bpase}$          | 0.0001603 |
| $d_{ald}$               | 0.0001526 |
| $d_{tpi}$               | 0.000173  |
| $d_{g3Pdh}$             | 0.0001707 |
| $d_{pglck}$             | 0.0001781 |
| $d_{pglcm}$             | 0.0001288 |
| $d_{enl}$               | 0.0001693 |
| $d_{pk}$                | 0.0001557 |
| $d_{ldh}$               | 0.0001397 |
| $d_{pyrd}$              | 0.0001062 |
| $d_{acyl.coa.syn}$      | 0.000178  |
| $d_{fa.synthase}$       | 0.0001338 |
| $d_{pyr.crbxylase}$     | 0.0001608 |
| $d_{pep.crbxykinase1}$  | 0.0001741 |
| $d_{cit.synthase}$      | 0.0001105 |
| $d_{actnase}$           | 0.0001128 |
| $d_{isocit.deh}$        | 0.000155  |
| $d_{KG.deh.cmp}$        | 0.0001485 |
| $d_{succ.coa.synthase}$ | 0.000189  |
| $d_{succ.deh}$          | 0.0001799 |
| $d_{frmase}$            | 0.0001734 |
| $d_{mal.deh}$           | 0.0001051 |
| $d_{g6P.deh}$           | 0.0001073 |
| $d_{pglc6}$             | 0.0001089 |
| $d_{phglc.deh}$         | 0.0001798 |
| $d_{r5Piso.A}$          | 0.0001943 |
| $d_{rbls.5P.3ep}$       | 0.0001684 |
| $d_{trkl}$              | 0.0001132 |
| $d_{trsd1.1}$           | 0.0001723 |

**Table S-15** Values of Michaelis Menten constants under consideration in the main article.

| Michaelis Menten constant values for metabolic pathway |            |
|--------------------------------------------------------|------------|
| $K_0^M(m)$                                             | 0.05564    |
| $K_1^M(m)$                                             | 0.4479     |
| $K_2^M(m)$                                             | 0.05966    |
| $K_3^M(m)$                                             | 0.052076   |
| $K_4^M(m)$                                             | 0.4479     |
| $K_5^M(m)$                                             | 0.052373   |
| $K_6^M(m)$                                             | 0.4289     |
| $K_7^M(m)$                                             | 0.054248   |
| $K_8^M(m)$                                             | 0.4654     |
| $K_9^M(m)$                                             | 0.053261   |
| $K_{10}^M(m)$                                          | 0.07412    |
| $K_{11}^M(m)$                                          | 0.052933   |
| $K_{12}^M(m)$                                          | 0.4415     |
| $K_{13}^M(m)$                                          | 0.09692    |
| $K_{14}^M(m)$                                          | 0.41931    |
| $K_{15}^M(m)$                                          | 0.051036   |
| $K_{16}^M(m)$                                          | 0.4729     |
| $K_{17}^M(m)$                                          | 0.13405    |
| $K_{18}^M(m)$                                          | 0.4658     |
| $K_{19}^M(m)$                                          | 0.053377   |
| $K_{20}^M(m)$                                          | 0.3951     |
| $K_{21}^M(m)$                                          | 0.073413   |
| $K_{22}^M(m)$                                          | 0.42947    |
| $K_{23}^M(m)$                                          | 0.13745    |
| $K_{24}^M(m)$                                          | 0.49851    |
| $K_{25}^M(m)$                                          | 0.054972   |
| $K_{26}^M(m)$                                          | 0.45491484 |
| $K_{27}^M(m)$                                          | 0.1576     |
| $K_{28}^M(m)$                                          | 0.074994   |
| $K_{29}^M(m)$                                          | 0.4786     |
| $K_{30}^M(m)$                                          | 0.052321   |
| $K_{31}^M(m)$                                          | 0.052518   |
| $K_{32}^M(m)$                                          | 0.42146    |
| $K_{33}^M(m)$                                          | 0.053936   |
| $K_{34}^M(m)$                                          | 0.063326   |
| $K_{35}^M(m)$                                          | 0.050974   |
| $K_{36}^M(m)$                                          | 0.4698     |
| $K_{37}^M(m)$                                          | 0.054877   |
| $K_{38}^M(m)$                                          | 0.051364   |
| $K_{39}^M(m)$                                          | 0.051125   |
| $K_{40}^M(m)$                                          | 0.093633   |
| $K_{41}^M(m)$                                          | 0.4922     |
| $K_{42}^M(m)$                                          | 0.062864   |
| $K_{43}^M(m)$                                          | 0.052887   |
| $K_{44}^M(m)$                                          | 0.084375   |
| $K_{45}^M(m)$                                          | 0.092682   |
| $K_{46}^M(m)$                                          | 0.052271   |
| $K_{47}^M(m)$                                          | 0.073521   |
| $K_{48}^M(m)$                                          | 0.063836   |

## B Supplementary Figures

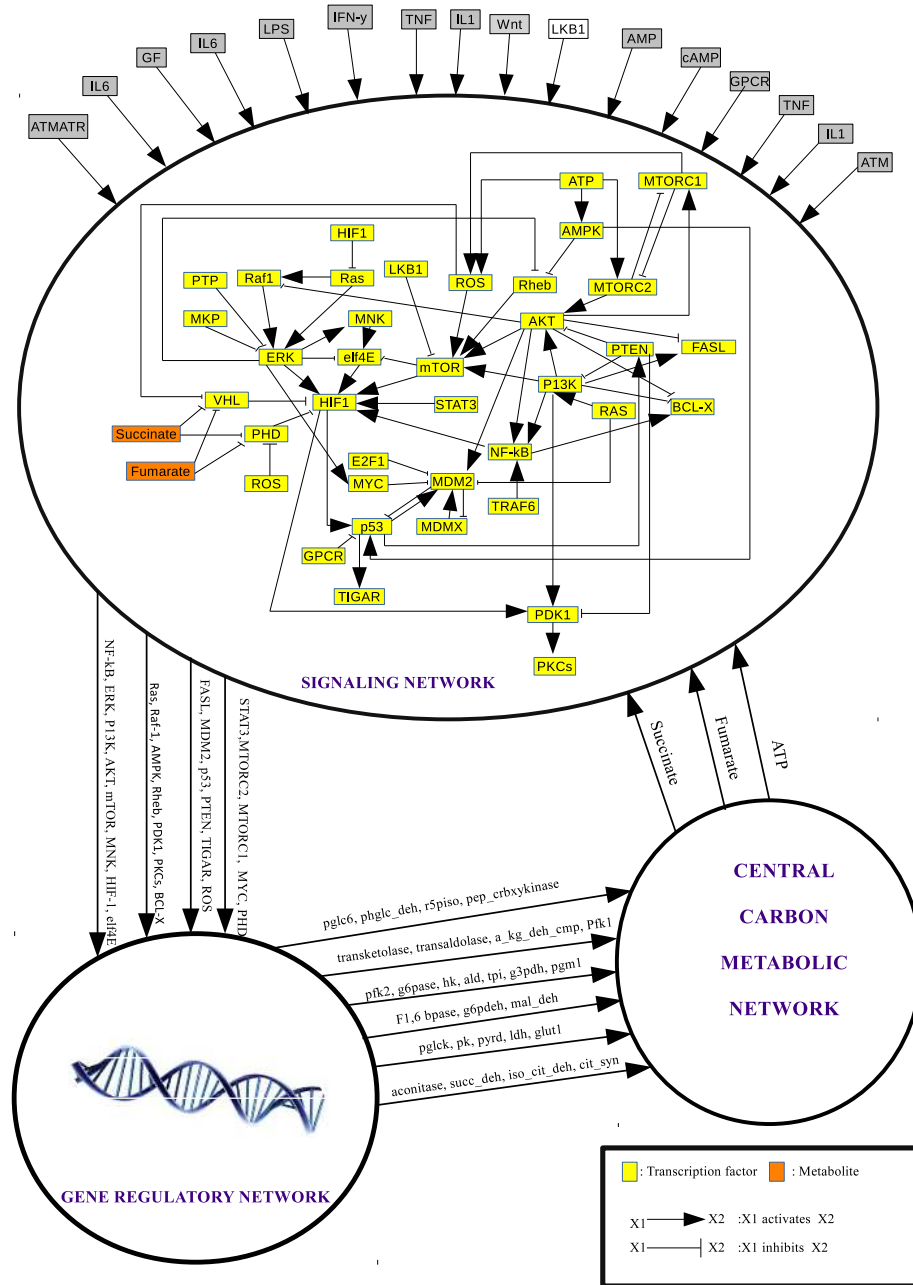

**Figure S-1** Block diagram of the interactions among metabolic, signaling and gene regulatory networks related to central carbon metabolism of mammalian cells.

## Validation of model in normal condition

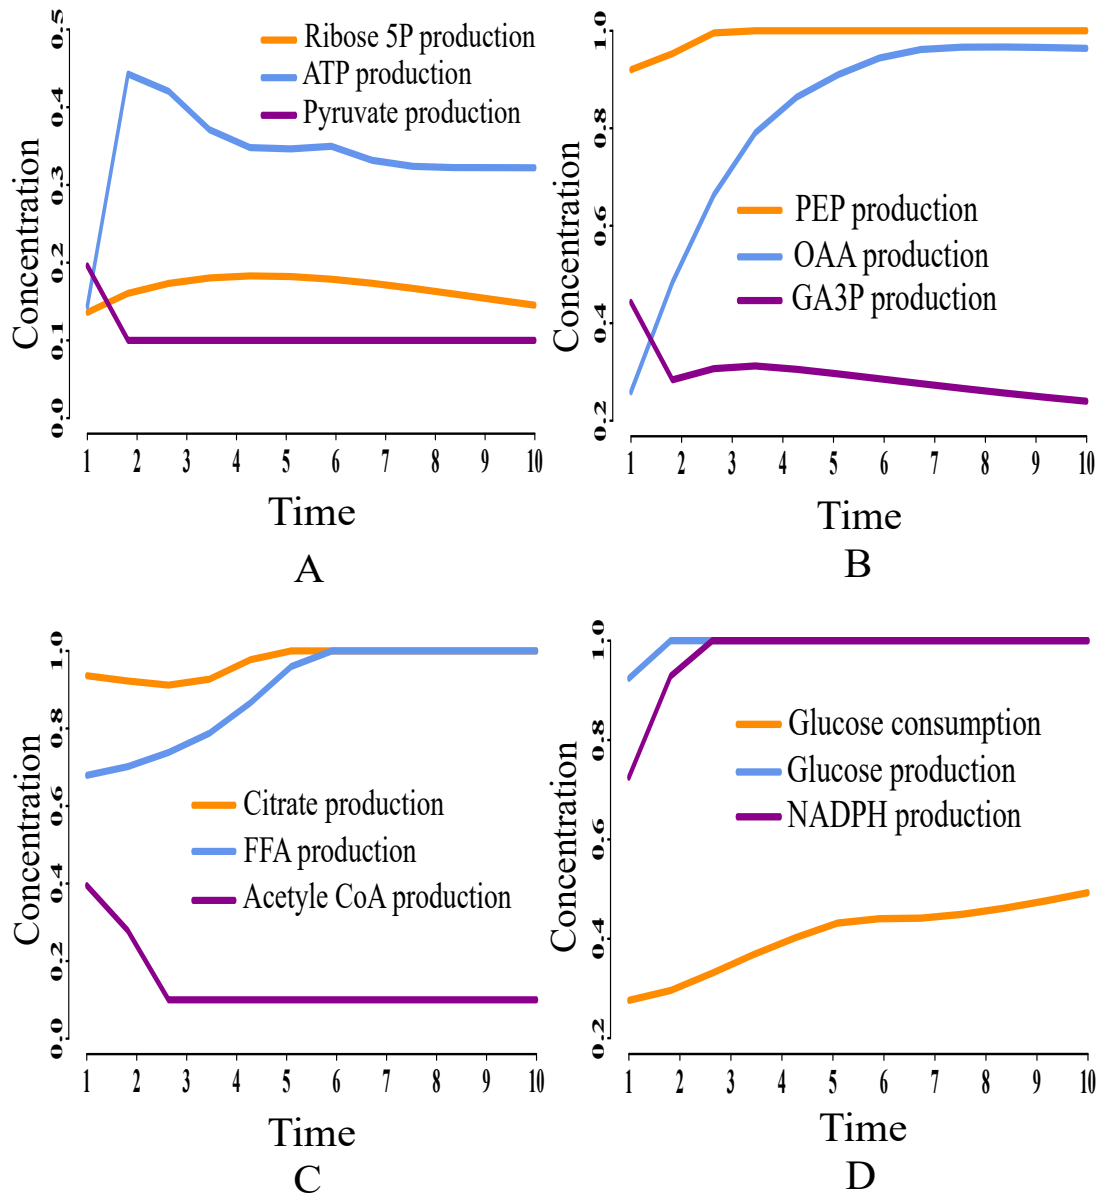

**Figure S-2** Variation of concentrations of ribose 5P, ATP, pyruvate, PEP, OAA, GA3P (glyceraldehyde-3P), citrate, FFA, acetyl CoA and NADPH along with glucose consumption and production over time to validate the normal behavior of the integrated biochemical pathway related to carbon metabolism of mammalian cells.

### Validation of model in normal vs perturbed condition

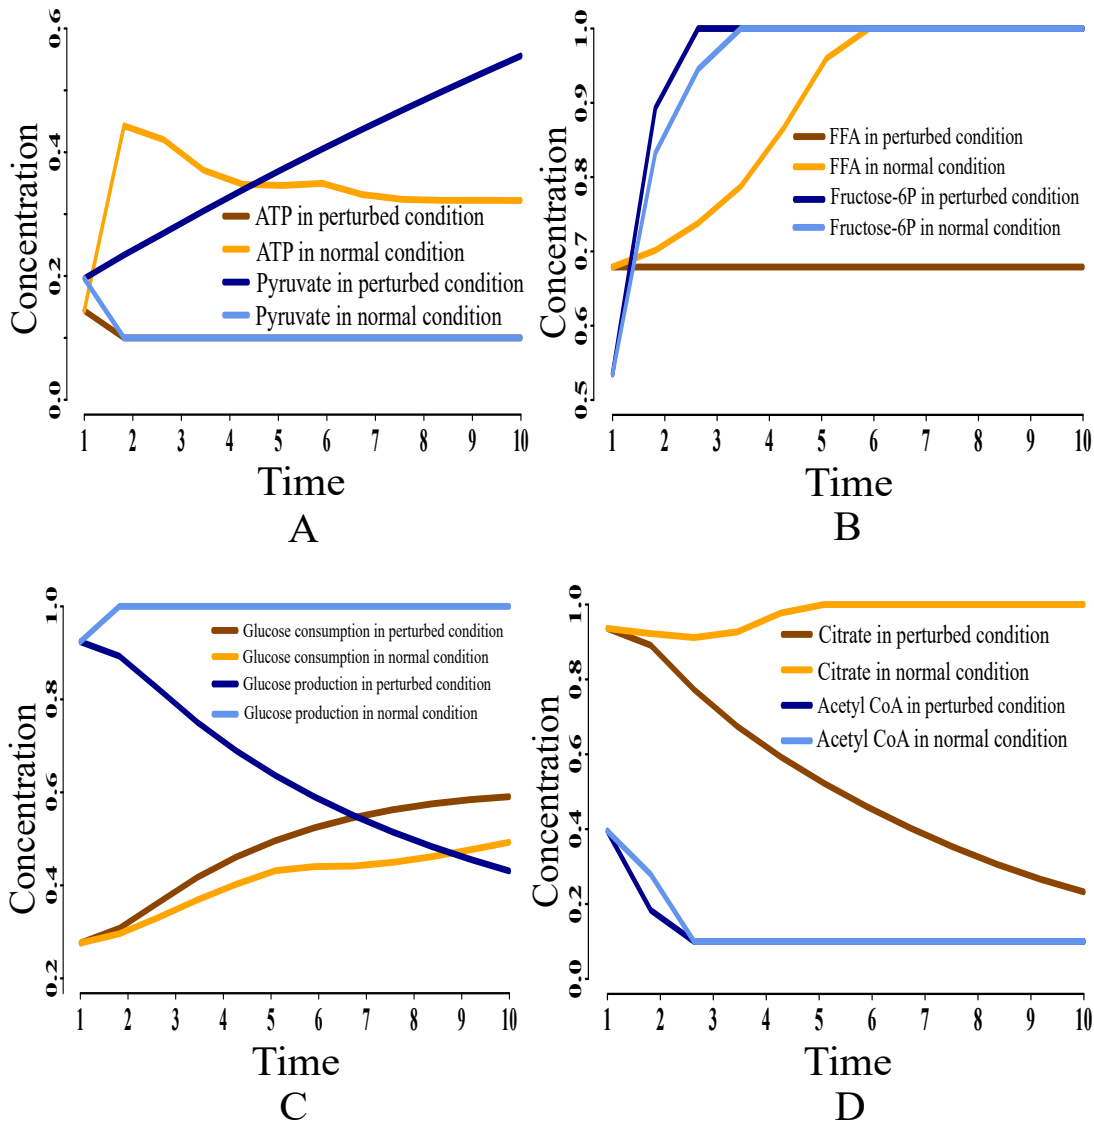

**Figure S-3** Change of concentrations of ATP, pyruvate, FFA, fructose 6P, citrate, acetyl CoA over time along with glucose consumption and production in the integrated biochemical pathway related to carbon metabolism in perturbed condition compared to that in normal mammalian cells.



## Validation of model in normal vs perturbed condition

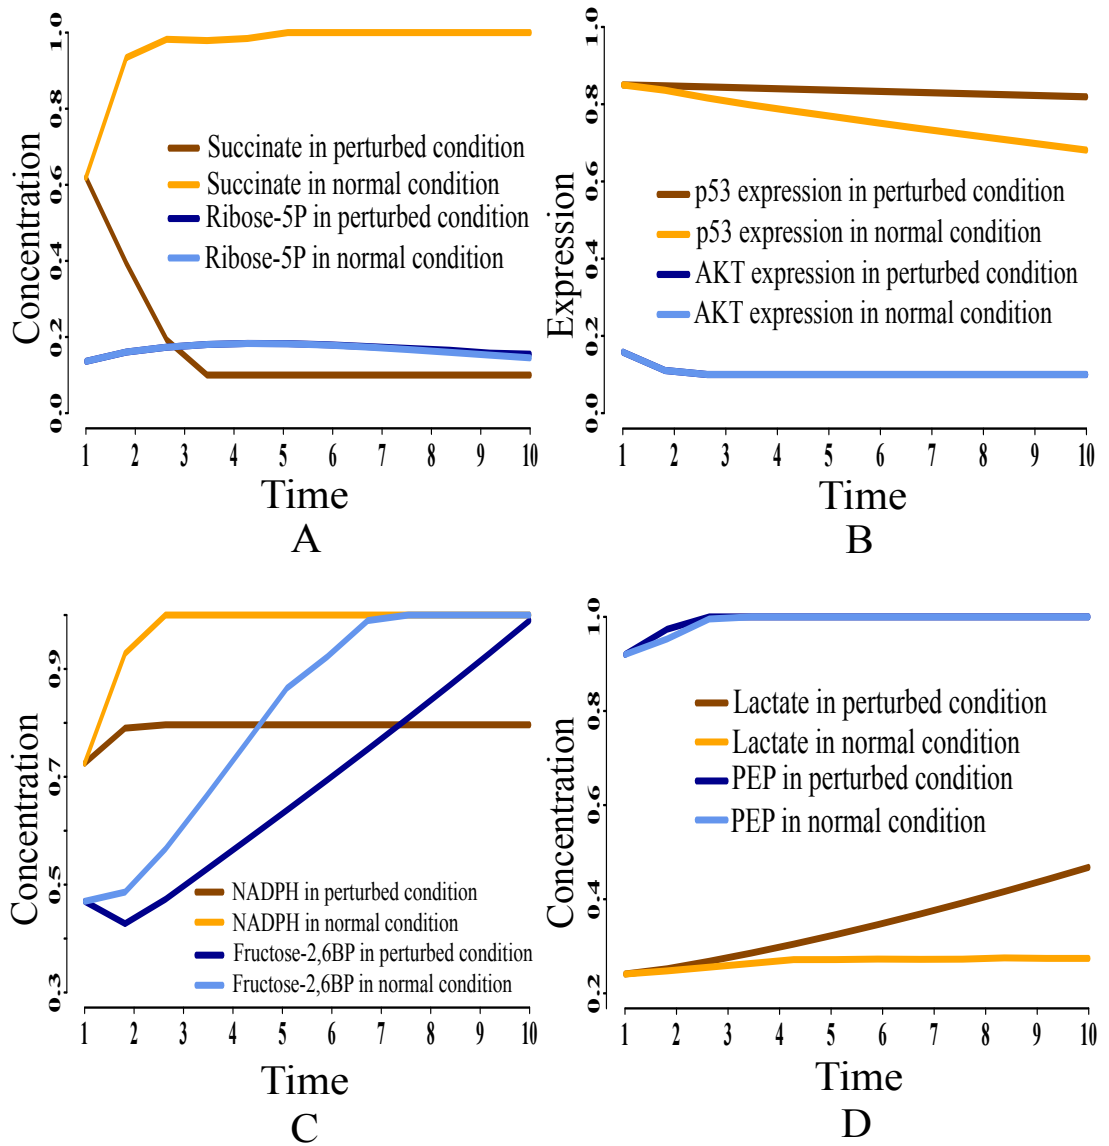

**Figure S-4** Change of concentrations/expressions of succinate, ribose 5P, p53, AKT, NADPH, fructose 2,6 bisphosphate, lactate and PEP participating in the integrated biochemical pathway related to carbon metabolism in perturbed condition compared to that in normal mammalian cells.

## C Supplementary Algorithms

---

**Algorithm S-1** GA Controller Algorithm: Assuming there are  $C$  chromosomes (possible number of solution sets) in a population and  $G$  generations. Here  $C$  contains input-output variables. We have applied exceptional handling to find real valued solution for the output of the algorithm.

---

**Input:**  $\langle \mathbf{x}, \mathbf{y}, \mathbf{z}, \mathbf{u} \rangle_{current}^{(in)}, \mathbf{v}_{current}$

**Output:**  $\langle \mathbf{x}, \mathbf{y}, \mathbf{z}, \mathbf{u} \rangle_{new}^{(in)}, fitness^{max}$

```

1:  $fitness^{max} \leftarrow 0$ 
2:  $limit \leftarrow 0.1$ 
3: Population  $\leftarrow$  Create_Random_Population( $\langle \mathbf{x}, \mathbf{y}, \mathbf{z}, \mathbf{u} \rangle_{current}^{(in)}$ )
4: for gen = 1 to G do
5:   for solution = 1 to C do
6:      $fitness_{val} \leftarrow$  Calculate_Fitness(solution,  $\mathbf{v}_{current}$ )
7:      $weighted_{pop}.append \leftarrow$  Make_Pair(solution,  $fitness_{val}$ )
8:   end for
9:   Population  $\leftarrow$  Null
10:  for j = 1 to C/2 do
11:     $solution_1, solution_2 \leftarrow$  Selection( $weighted_{pop}$ )
12:     $solution_1^{modified}, solution_2^{modified} \leftarrow$  Crossover( $solution_1, solution_2$ )
13:    Population.add  $\leftarrow$  Mutation( $solution_1^{modified}$ )
14:    Population.add  $\leftarrow$  Mutation( $solution_2^{modified}$ )
15:  end for
16:   $Fittest_{solution}, fitness^{max} \leftarrow$  Find_Fittest_Sol(Population)
17:   $\langle \mathbf{x}, \mathbf{y}, \mathbf{z}, \mathbf{u} \rangle_{new}^{(in)} \leftarrow Fittest_{solution}$ 
18:  if ( $1/fitness^{max} < limit$ ) then
19:    break
20:  else
21:    continue
22:  end if
23: end for
24: return  $\langle \mathbf{x}, \mathbf{y}, \mathbf{z}, \mathbf{u} \rangle_{new}^{(in)}, fitness^{max}$ 

```

---

---

**Algorithm S-2** Controlling the outputs at some specific values using GA controller.

---

**Input:** Trained SVR model, MIMO Plant model, initial input  $\mathbf{v}_{current}$  and reference input  $\langle \mathbf{x}, \mathbf{y}, \mathbf{z} \rangle_{reference}^{(out)}$ .

**Output:** Final optimal input  $\langle \mathbf{x}, \mathbf{y}, \mathbf{z}, \mathbf{u} \rangle_{final}^{(in)}$

```

1: tolerance  $\leftarrow$  0.01
2: threshold  $\leftarrow$  0.01
3:  $fitness^{previous} \leftarrow$  0
4: limit  $\leftarrow$  30
5: count  $\leftarrow$  0
6: flag  $\leftarrow$  0
7: Generate  $\langle \mathbf{x}, \mathbf{y}, \mathbf{z}, \mathbf{u} \rangle_{current}^{(in)}$  from  $\mathbf{v}_{current}$ 
8: for i = 1 to MAXIMUM_ITERATION do
9:    $\langle \mathbf{x}, \mathbf{y}, \mathbf{z}, \mathbf{u} \rangle_{new}^{(in)}, fitness^{current} \leftarrow$  GA-controller( $\langle \mathbf{x}, \mathbf{y}, \mathbf{z}, \mathbf{u} \rangle_{current}^{(in)}, \mathbf{v}_{current}$ )
10:  if ((i  $\geq$  2) and ( $fitness^{previous} - fitness^{current} >$  tolerance)) then
11:    if count > limit then
12:      flag  $\leftarrow$  1
13:    else
14:      count  $\leftarrow$  count + 1
15:      flag  $\leftarrow$  0
16:      Continue loop with  $fitness^{previous}$  and  $\langle \mathbf{x}, \mathbf{y}, \mathbf{z}, \mathbf{u} \rangle_{current}^{(in)}$ 
17:    end if
18:  else
19:     $fitness^{previous} \leftarrow fitness^{current}$ 
20:    flag  $\leftarrow$  1
21:  end if
22:  if flag = 1 then
23:    Create  $\mathbf{v}_{new}$  from  $\langle \mathbf{x}, \mathbf{y}, \mathbf{z}, \mathbf{u} \rangle_{new}^{(in)}$ 
24:     $\mathbf{v}_{current} \leftarrow \mathbf{v}_{new}$ 
25:     $fitness^{previous} \leftarrow fitness^{current}$ 
26:     $Y_{prediction} \leftarrow$  SVR_Model_Predction( $\mathbf{v}_{new}$ )
27:     $Y_{actual} \leftarrow$  Plant_Output_Predction( $\langle \mathbf{x}, \mathbf{y}, \mathbf{z}, \mathbf{u} \rangle_{new}^{(in)}$ )
28:    if count > limit then
29:      print "Interrupt optimizing due to stuck at lower fitness solution...!!"
30:      break
31:    end if
32:    if ( $\langle \mathbf{x}, \mathbf{y}, \mathbf{z} \rangle_{reference}^{(out)} - \langle \mathbf{x}, \mathbf{y}, \mathbf{z} \rangle^{(out)} <$  threshold) then
33:       $\langle \mathbf{x}, \mathbf{y}, \mathbf{z}, \mathbf{u} \rangle_{final}^{(in)} \leftarrow \langle \mathbf{x}, \mathbf{y}, \mathbf{z}, \mathbf{u} \rangle_{new}^{(in)}$ 
34:      break
35:    end if
36:  end if
37: end for
38: return  $\langle \mathbf{x}, \mathbf{y}, \mathbf{z}, \mathbf{u} \rangle_{final}^{(in)}$ 

```

---
